# Supplementary material for: Influenza and Pneumococcal Vaccination Uptake in Patients with Rheumatoid Arthritis Treated with Immunosuppressive Therapy in the UK: A Retrospective Cohort Study Using Data from the Clinical Practice Research Datalink
Source: PLoS One. 2016 Apr 20;11(4):e0153848. doi: 10.1371/journal.pone.0153848 (PMC4838312; doi:10.1371/journal.pone.0153848)
Supplement: S3 Table — (XLSX) [file pone.0153848.s003.xlsx]

## Sheet: Medcodes
medcode	readcode	description
18684	9OX3.00	Has 'flu vaccination at hosp.
18330	9OX1.00	Has 'flu vaccination at home
9039	9OX..00	Influenza vacc. administratn.
98304	65EC.00	PANDEMRIX - 2nd flu A (H1N1v) 2009 vac by othr hlth provider
32942	9OX8.00	Has influenza vaccination at work
98303	65E8.00	CELVAPAN - 2nd flu A (H1N1v) 2009 vacc by othr hlth provider
98183	65E9.00	PANDEMRIX - first influenza A (H1N1v) 2009 vaccination given
44555	9OX2.00	Has'flu vaccination at surgery
98203	65EB.00	PANDEMRIX - 1st flu A (H1N1v) 2009 vac by othr hlth provider
98184	65EA.00	PANDEMRIX - second influenza A (H1N1v) 2009 vaccination give
105195	65ED000	Seasonal influenza vaccination given by pharmacist
98449	65E7.00	CELVAPAN - 1st flu A (H1N1v) 2009 vacc by othr hlth provider
12336	ZV04800	[V]Influenza vaccination
98217	65E3.00	1st pandemic influenza vacc give by other healthcare providr
95092	65E1.00	Second pandemic influenza vaccination
98302	65E6.00	CELVAPAN - second influenza A (H1N1v) 2009 vaccination given
104688	65ED.00	Seasonal influenza vaccination
98306	65E4.00	2nd pandemic influenza vacc give by other healthcare providr
97941	65E2.00	Influenza vaccination given by other healthcare provider
12104	9OX..11	Flu vaccination administration
6	65E..00	Influenza vaccination
21123	ZV04811	[V]Flu - influenza vaccination
105077	65E2000	Seasonal influenza vaccin given by other healthcare provider

## Sheet: Prodcodes
prodcode	Product name
639	Influenza vaccine (split virion, inactivated) suspension for injection 0.5ml pre-filled syringes
1329	Fluvirin vaccine suspension for injection 0.5ml pre-filled syringes (Novartis Vaccines and Diagnostics Ltd)
2552	Influvac Sub-unit vaccine suspension for injection 0.5ml pre-filled syringes (Abbott Healthcare Products Ltd)
922	Influenza inactivated surface antigen Vaccination
2601	Mfv-ject Vaccination (Aventis Pasteur MSD)
2139	Fluarix vaccine suspension for injection 0.5ml pre-filled syringes (GlaxoSmithKline UK Ltd)
834	Begrivac vaccine suspension for injection 0.5ml pre-filled syringes (Novartis Vaccines and Diagnostics Ltd)
398	Influenza inactivated split virion Vaccination (Aventis Pasteur MSD)
13595	Fluzone Vaccination (Aventis Pasteur MSD)
11824	Enzira vaccine suspension for injection 0.5ml pre-filled syringes (Pfizer Ltd)
27407	Imuvac vaccine suspension for injection 0.5ml pre-filled syringes (Abbott Healthcare Products Ltd)
9710	Agrippal vaccine suspension for injection 0.5ml pre-filled syringes (Novartis Vaccines and Diagnostics Ltd)
10030	Inflexal V vaccine suspension for injection 0.5ml pre-filled syringes (Janssen-Cilag Ltd)
16585	Viroflu vaccine suspension for injection 0.5ml pre-filled syringes (Janssen-Cilag Ltd)
43825	Intanza 15microgram strain vaccine suspension for injection 0.1ml pre-filled syringes (sanofi pasteur MSD Ltd)
30198	Influenza inactivated split virion Vaccination (sanofi pasteur MSD Ltd)
48740	Influenza vaccine (surface antigen, inactivated) suspension for injection 0.5ml pre-filled syringes
41168	Influenza H1N1 vaccine (split virion, inactivated, adjuvanted) emulsion and suspension for emulsion for injection
48658	Influenza vaccine (split virion, inactivated) suspension for injection 0.5ml pre-filled syringes (sanofi pasteur MSD Ltd)
41150	Pandemrix vaccine emulsion and suspension for emulsion for injection (GlaxoSmithKline UK Ltd)
40760	Influenza vaccine (split virion, inactivated) 15microgram strain suspension for injection 0.1ml pre-filled syringes
57678	Fluenz vaccine nasal suspension 0.2ml unit dose (AstraZeneca UK Ltd)
45661	Influenza vaccine (split virion, inactivated) suspension for injection 0.5ml pre-filled syringes (Pfizer Ltd)
40876	Influenza vaccine (split virion, inactivated) 9microgram strain suspension for injection 0.1ml pre-filled syringes
57401	Influvac Desu vaccine suspension for injection 0.5ml pre-filled syringes (Abbott Healthcare Products Ltd)
43827	Intanza 9microgram strain vaccine suspension for injection 0.1ml pre-filled syringes (sanofi pasteur MSD Ltd)
32391	Influenza vaccine (surface antigen, inactivated) suspension for injection 0.5ml pre-filled syringes (Novartis Vaccines and Diagnostics Ltd)
57917	Fluarix Tetra vaccine suspension for injection 0.5ml pre-filled syringes (GlaxoSmithKline UK Ltd)
57140	Influenza vaccine (live attenuated) nasal suspension 0.2ml unit dose
49716	Influenza vaccine (surface antigen, inactivated, virosome) suspension for injection 0.5ml pre-filled syringes
51087	Optaflu vaccine suspension for injection 0.5ml pre-filled syringes (Novartis Vaccines and Diagnostics Ltd)
41240	Influenza H1N1 vaccine (whole virion, Vero cell derived, inactivated) suspension for injection
41925	Celvapan (H1N1) vaccine (whole virion, Vero cell derived, inactivated) suspension for injection (Baxter Healthcare Ltd)
38421	Influenza inactivated split virion Vaccination (Evans Vaccines Ltd)
44759	INFLUENZA PRE-FILLED SYRINGE
48085	Influenza inactivated split virion Vaccination (Chiron UK Ltd)
51289	Influenza vaccine (live attenuated) nasal suspension 0.2ml unit dose
19684	INFLUVAC DISPOSABLE SYRINGE
47932	Fluenz vaccine nasal suspension 0.2ml unit dose (AstraZeneca UK Ltd)
18612	Mastaflu vaccine suspension for injection 0.5ml pre-filled syringes (Masta Ltd)
